# Supplementary material for: Comparison of infectious agents detected from hatchery and wild juvenile Coho salmon in British Columbia, 2008-2018
Source: PubMed Central journal article supplement (PMC6719873; doi:10.1371/journal.pone.0221956), 2019-09-03
Supplement: pone.0221956.s003.pdf [file pone.0221956.s003.pdf]

**S1 Table**

S1 Table. Location (M: Mainland and VI: Vancouver Island) and the number of fish (N) from the 13 freshwater hatcheries in the study.

| Hatchery         | Location | N   |
|------------------|----------|-----|
| Chilliwack River | M        | 59  |
| Capilano River   | M        | 46  |
| Snootli Creek    | M        | 38  |
| Tenderfoot Creek | M        | 35  |
| Chehalis River   | M        | 28  |
| Inch Creek       | M        | 23  |
| Spilus Creek     | M        | 5   |
| Conuma River     | VI       | 57  |
| Puntledge River  | VI       | 40  |
| Robertson Creek  | VI       | 30  |
| Nitinat River    | VI       | 29  |
| Quinsam River    | VI       | 26  |
| Kitimat River    | VI       | 20  |
| Total            | -        | 436 |
