# Supplementary material for: Comparison of infectious agents detected from hatchery and wild juvenile Coho salmon in British Columbia, 2008-2018
Source: PubMed Central journal article supplement (PMC6719873; doi:10.1371/journal.pone.0221956), 2019-09-03
Supplement: pone.0221956.s004.pdf [file pone.0221956.s004.pdf]

## S2 Table

S2 Table. Prevalence (%) and the range of samples tested (N) for the low-prevalent infectious agents (1% < prevalence < 5%) from 2,655 juvenile Coho salmon, by sampling region and origin (hatchery or wild). Four sampling regions: 1) freshwater-mainland; 2) freshwater-Vancouver Island (VI); 3) saltwater-east coast of VI; and 4) saltwater-west coast of VI. For infectious agents' complete names, refer to key in Table 1.

|    | Region | Origin | N       | te_bry | ic_hof | env  | te_mar | prv   | sp_des | my_ins | na_sal | cr_sal | ku_thy | fa_mar |
|----|--------|--------|---------|--------|--------|------|--------|-------|--------|--------|--------|--------|--------|--------|
| FW | Main   | H      | 254     | 0.00   | 0.00   | 0.39 | 0.00   | 1.18  | 1.18   | 0.00   | 0.00   | 0.00   | 0.00   | 0.00   |
|    |        | W      | 120-122 | 9.02   | 0.00   | 0.00 | 0.00   | 0.00  | 0.82   | 0.00   | 0.00   | 9.02   | 1.67   | 0.00   |
|    | VI     | H      | 180-182 | 3.30   | 0.00   | 0.56 | 0.00   | 1.10  | 1.10   | 0.00   | 0.00   | 0.00   | 0.00   | 0.00   |
|    |        | W      | 65-67   | 0.00   | 0.00   | 0.00 | 0.00   | 1.49  | 0.00   | 0.00   | 0.00   | 0.00   | 0.00   | 0.00   |
| SW | East   | H      | 513-522 | 7.50   | 2.88   | 3.47 | 4.68   | 8.05  | 0.57   | 0.38   | 0.96   | 0.77   | 2.30   | 1.55   |
|    |        | W      | 927-942 | 4.15   | 5.86   | 4.15 | 3.67   | 0.74  | 2.34   | 0.85   | 0.42   | 2.23   | 2.34   | 1.51   |
|    | West   | H      | 153-158 | 6.37   | 2.53   | 5.06 | 7.84   | 10.90 | 0.00   | 5.06   | 10.76  | 0.00   | 3.18   | 3.82   |
|    |        | W      | 402-408 | 5.90   | 5.69   | 5.94 | 3.71   | 1.72  | 5.90   | 7.65   | 5.41   | 1.72   | 0.98   | 1.99   |
