# Supplementary material for: Comparison of infectious agents detected from hatchery and wild juvenile Coho salmon in British Columbia, 2008-2018
Source: PubMed Central journal article supplement (PMC6719873; doi:10.1371/journal.pone.0221956), 2019-09-03
Supplement: pone.0221956.s005.pdf [file pone.0221956.s005.pdf]

S3 Table. Results of the logistic regression models, evaluating the associations between sampling region and origin, and the prevalence of each common infectious agent (dichotomous outcome). Sampling regions: 1) freshwater-mainland; 2) freshwater-Vancouver Island (VI); 3) saltwater-east coast of VI; and 4) saltwater-west coast of VI.

| Agent          | Variables        | Coefficient       | SE      | 95% CI |        | P-value |
|----------------|------------------|-------------------|---------|--------|--------|---------|
|                |                  |                   |         | L      | U      |         |
| <b>c_b_cys</b> | FW Main#Hatchery | Ref. <sup>a</sup> |         |        |        |         |
|                | FW Main#Wild     | -0.49             | 0.34    | -1.16  | 0.17   | 0.145   |
|                | FW VI#Hatchery   | -0.74             | 0.24    | -1.20  | -0.28  | 0.002   |
|                | FW VI#Wild       | -3.21             | 0.38    | -3.97  | -2.46  | <0.001  |
|                | SW East#Hatchery | 2.03              | 0.32    | 1.39   | 2.66   | <0.001  |
|                | SW East#Wild     | 1.44              | 0.24    | 0.97   | 1.91   | <0.001  |
|                | SW West#Hatchery | 2.47              | 0.62    | 1.26   | 3.68   | <0.001  |
| SW West#Wild   | 1.80             | 0.34              | 1.14    | 2.47   | <0.001 |         |
| <b>pa_ther</b> | SW East#Hatchery | Ref.              |         |        |        |         |
|                | SW East#Wild     | 0.31              | 0.11    | 0.09   | 0.54   | 0.006   |
|                | SW West#Hatchery | 0.35              | 0.20    | -0.03  | 0.74   | 0.074   |
|                | SW West#Wild     | 0.53              | 0.16    | 0.23   | 0.84   | 0.001   |
| <b>pa_pse</b>  | SW East#Hatchery | Ref.              |         |        |        |         |
|                | SW East#Wild     | 0.32              | 0.12    | 0.08   | 0.55   | 0.008   |
|                | SW West#Hatchery | 0.63              | 0.20    | 0.24   | 1.03   | 0.002   |
|                | SW West#Wild     | 0.75              | 0.16    | 0.44   | 1.07   | <0.001  |
| <b>lo_sal</b>  | FW Main#Hatchery | Ref.              |         |        |        |         |
|                | FW Main#Wild     | 4.47              | 1.03    | 2.45   | 6.49   | <0.001  |
|                | FW VI#Hatchery   | 3.50              | 1.03    | 1.48   | 5.51   | 0.001   |
|                | FW VI#Wild       | 3.36              | 1.07    | 1.25   | 5.47   | 0.002   |
|                | SW East#Hatchery | 4.83              | 1.01    | 2.86   | 6.81   | <0.001  |
|                | SW East#Wild     | 5.03              | 1.01    | 3.06   | 7.01   | <0.001  |
|                | SW West#Hatchery | 4.75              | 1.02    | 2.76   | 6.75   | <0.001  |
|                | SW West#Wild     | 5.10              | 1.01    | 3.11   | 7.08   | <0.001  |
| <b>pa_min</b>  | SW East#Hatchery | Ref.              |         |        |        |         |
|                | SW East#Wild     | -0.28             | 0.12    | -0.51  | -0.04  | 0.021   |
|                | SW West#Hatchery | -1.00             | 0.21    | -1.42  | -0.59  | <0.001  |
|                | SW West#Wild     | -1.40             | 0.17    | -1.74  | -1.06  | <0.001  |
|                | FW Main#Hatchery | Ref.              |         |        |        |         |
| <b>my_arc</b>  | FW Main#Wild     | 2.53              | 0.42    | 1.71   | 3.35   | <0.001  |
|                | FW VI#Hatchery   | -0.99             | 0.67    | -2.30  | 0.31   | 0.136   |
|                | FW VI#Wild       | 0.73              | 0.57    | -0.39  | 1.86   | 0.201   |
|                | SW East#Hatchery | 0.08              | 0.38    | -0.66  | 0.82   | 0.838   |
|                | SW East#Wild     | 1.09              | 0.34    | 0.42   | 1.76   | 0.001   |
|                | SW West#Hatchery | -0.97             | 0.67    | -2.29  | 0.35   | 0.149   |
|                | SW West#Wild     | 0.85              | 0.37    | 0.12   | 1.59   | 0.023   |
| <b>fl_psy</b>  | FW Main#Hatchery | Ref.              |         |        |        |         |
|                | FW Main#Wild     | -1.78             | 0.48    | -2.73  | -0.84  | <0.001  |
|                | FW VI#Hatchery   | -2.83             | 0.32    | -3.45  | -2.21  | <0.001  |
|                | FW VI#Wild       | -1.33             | 0.45    | -2.20  | -0.45  | 0.003   |
| <b>sch</b>     | SW East#Hatchery | Ref.              |         |        |        |         |
|                | SW East#Wild     | -0.62             | 0.19    | -0.99  | -0.24  | 0.001   |
|                | SW West#Hatchery | 0.13              | 0.29    | -0.44  | 0.71   | 0.648   |
|                | SW West#Wild     | 0.15              | 0.23    | -0.29  | 0.59   | 0.507   |
| <b>pa_kab</b>  | FW Main#Hatchery | Ref.              |         |        |        |         |
|                | FW Main#Wild     | 0.00              | (empty) |        |        |         |
|                | FW Main#Wild     | -0.54             | 0.43    | -1.38  | 0.31   | 0.212   |
|                | FW VI#Hatchery   | 0.30              | 0.32    | -0.33  | 0.93   | 0.355   |
|                | FW VI#Wild       | 0.61              | 0.41    | -0.18  | 1.41   | 0.132   |
|                | SW East#Hatchery | -1.65             | 0.33    | -2.30  | -1.00  | <0.001  |
| SW East#Wild   | -1.27            | 0.24              | -1.74   | -0.80  | <0.001 |         |

|               |                  |       |           |       |       |        |
|---------------|------------------|-------|-----------|-------|-------|--------|
|               | SW West#Hatchery | -1.07 | 0.42      | -1.89 | -0.25 | 0.010  |
|               | SW West#Wild     | 0.00  | (omitted) |       |       |        |
| <b>ce_sha</b> | SW East#Hatchery | Ref.  |           |       |       |        |
|               | SW East#Wild     | -0.52 | 0.23      | -0.97 | -0.06 | 0.025  |
|               | SW West#Hatchery | 1.21  | 0.29      | 0.63  | 1.78  | <0.001 |
|               | SW West#Wild     | 0.26  | 0.28      | -0.29 | 0.80  | 0.356  |

<sup>a</sup> Reference (or baseline) category/region; 95 confidence interval for the coefficients indicate the comparison of individual region-origin with the baseline for each agent.

Note: in all models, the overall effects of sampling region-origin on the prevalence of individual agents were highly significant ( $P < 0.001$  for all).
