# Supplementary material for: Comparison of infectious agents detected from hatchery and wild juvenile Coho salmon in British Columbia, 2008-2018
Source: PubMed Central journal article supplement (PMC6719873; doi:10.1371/journal.pone.0221956), 2019-09-03
Supplement: pone.0221956.s006.pdf [file pone.0221956.s006.pdf]

S4 Table. Pairwise comparisons for all of the models in the study: Diversity, Relative Infection Burdon (RIB-log), and the prevalence of ten common agents. Bonferroni adjustment has been applied to all analyses, including combinations of fish origin (Hatchery or Wild) and sampling regions: 1) freshwater-mainland (FW Main); 2) freshwater-Vancouver Island (FW VI); 3) saltwater-east coast of VI (SW East); and 4) saltwater-west coast of VI (SW West).

| Model                                    | Coefficient | SE    | 95% CI |        | P-value |
|------------------------------------------|-------------|-------|--------|--------|---------|
|                                          |             |       | L      | U      |         |
| <b>Diversity</b>                         |             |       |        |        |         |
| (FW Main#Wild) vs (FW Main#Hatchery)     | 0.386       | 0.088 | 0.111  | 0.661  | <0.001  |
| (FW VI#Hatchery) vs (FW Main#Hatchery)   | -0.171      | 0.089 | -0.448 | 0.107  | 1.000   |
| (FW VI#Wild) vs (FW Main#Hatchery)       | -0.325      | 0.138 | -0.755 | 0.105  | 0.510   |
| (SW East#Hatchery) vs (FW Main#Hatchery) | 0.880       | 0.061 | 0.689  | 1.072  | <0.001  |
| (SW East#Wild) vs (FW Main#Hatchery)     | 0.912       | 0.059 | 0.727  | 1.097  | <0.001  |
| (SW West#Hatchery) vs (FW Main#Hatchery) | 0.998       | 0.071 | 0.777  | 1.219  | <0.001  |
| (SW West#Wild) vs (FW Main#Hatchery)     | 1.008       | 0.064 | 0.809  | 1.207  | <0.001  |
| (FW VI#Hatchery) vs (FW Main#Wild)       | -0.557      | 0.098 | -0.862 | -0.252 | <0.001  |
| (FW VI#Wild) vs (FW Main#Wild)           | -0.711      | 0.142 | -1.155 | -0.267 | <0.001  |
| (SW East#Hatchery) vs (FW Main#Wild)     | 0.494       | 0.071 | 0.272  | 0.716  | <0.001  |
| (SW East#Wild) vs (FW Main#Wild)         | 0.526       | 0.069 | 0.309  | 0.743  | <0.001  |
| (SW West#Hatchery) vs (FW Main#Wild)     | 0.612       | 0.078 | 0.367  | 0.857  | <0.001  |
| (SW West#Wild) vs (FW Main#Wild)         | 0.622       | 0.072 | 0.398  | 0.846  | <0.001  |
| (FW VI#Wild) vs (FW VI#Hatchery)         | -0.154      | 0.145 | -0.609 | 0.300  | 1.000   |
| (SW East#Hatchery) vs (FW VI#Hatchery)   | 1.051       | 0.076 | 0.812  | 1.290  | <0.001  |
| (SW East#Wild) vs (FW VI#Hatchery)       | 1.082       | 0.075 | 0.850  | 1.315  | <0.001  |
| (SW West#Hatchery) vs (FW VI#Hatchery)   | 1.169       | 0.083 | 0.911  | 1.427  | <0.001  |
| (SW West#Wild) vs (FW VI#Hatchery)       | 1.179       | 0.077 | 0.939  | 1.419  | <0.001  |
| (SW East#Hatchery) vs (FW VI#Wild)       | 1.205       | 0.128 | 0.804  | 1.606  | <0.001  |
| (SW East#Wild) vs (FW VI#Wild)           | 1.237       | 0.127 | 0.839  | 1.634  | <0.001  |
| (SW West#Hatchery) vs (FW VI#Wild)       | 1.323       | 0.133 | 0.908  | 1.738  | <0.001  |
| (SW West#Wild) vs (FW VI#Wild)           | 1.333       | 0.129 | 0.928  | 1.737  | <0.001  |
| (SW East#Wild) vs (SW East#Hatchery)     | 0.032       | 0.031 | -0.065 | 0.128  | 1.000   |
| (SW West#Hatchery) vs (SW East#Hatchery) | 0.118       | 0.050 | -0.039 | 0.275  | 0.532   |
| (SW West#Wild) vs (SW East#Hatchery)     | 0.128       | 0.039 | 0.006  | 0.250  | 0.029   |
| (SW West#Hatchery) vs (SW East#Wild)     | 0.086       | 0.047 | -0.060 | 0.232  | 1.000   |
| (SW West#Wild) vs (SW East#Wild)         | 0.096       | 0.034 | -0.011 | 0.204  | 0.142   |
| (SW West#Wild) vs (SW West#Hatchery)     | 0.010       | 0.050 | -0.145 | 0.165  | 1.000   |
| <b>RIB-log</b>                           |             |       |        |        |         |
| (FW Main#Wild) vs (FW Main#Hatchery)     | 0.444       | 0.117 | 0.078  | 0.810  | 0.004   |
| (FW VI#Hatchery) vs (FW Main#Hatchery)   | -0.631      | 0.097 | -0.935 | -0.328 | <0.001  |
| (FW VI#Wild) vs (FW Main#Hatchery)       | -0.490      | 0.136 | -0.916 | -0.065 | 0.009   |
| (SW East#Hatchery) vs (FW Main#Hatchery) | 0.618       | 0.078 | 0.373  | 0.863  | <0.001  |
| (SW East#Wild) vs (FW Main#Hatchery)     | 0.533       | 0.074 | 0.303  | 0.763  | <0.001  |
| (SW West#Hatchery) vs (FW Main#Hatchery) | 0.866       | 0.103 | 0.544  | 1.187  | <0.001  |
| (SW West#Wild) vs (FW Main#Hatchery)     | 0.767       | 0.086 | 0.497  | 1.037  | <0.001  |
| (FW VI#Hatchery) vs (FW Main#Wild)       | -1.075      | 0.124 | -1.462 | -0.689 | <0.001  |
| (FW VI#Wild) vs (FW Main#Wild)           | -0.934      | 0.152 | -1.408 | -0.460 | <0.001  |
| (SW East#Hatchery) vs (FW Main#Wild)     | 0.174       | 0.103 | -0.147 | 0.495  | 1.000   |
| (SW East#Wild) vs (FW Main#Wild)         | 0.089       | 0.099 | -0.220 | 0.399  | 1.000   |
| (SW West#Hatchery) vs (FW Main#Wild)     | 0.422       | 0.121 | 0.044  | 0.800  | 0.014   |
| (SW West#Wild) vs (FW Main#Wild)         | 0.323       | 0.106 | -0.009 | 0.656  | 0.067   |
| (FW VI#Wild) vs (FW VI#Hatchery)         | 0.141       | 0.146 | -0.314 | 0.596  | 1.000   |
| (SW East#Hatchery) vs (FW VI#Hatchery)   | 1.249       | 0.092 | 0.963  | 1.536  | <0.001  |
| (SW East#Wild) vs (FW VI#Hatchery)       | 1.165       | 0.087 | 0.894  | 1.436  | <0.001  |
| (SW West#Hatchery) vs (FW VI#Hatchery)   | 1.497       | 0.110 | 1.152  | 1.842  | <0.001  |
| (SW West#Wild) vs (FW VI#Hatchery)       | 1.399       | 0.096 | 1.099  | 1.698  | <0.001  |
| (SW East#Hatchery) vs (FW VI#Wild)       | 1.108       | 0.128 | 0.709  | 1.508  | <0.001  |
| (SW East#Wild) vs (FW VI#Wild)           | 1.024       | 0.125 | 0.635  | 1.413  | <0.001  |

|                                          |        |       |        |        |        |
|------------------------------------------|--------|-------|--------|--------|--------|
| (SW West#Hatchery) vs (FW VI#Wild)       | 1.356  | 0.143 | 0.909  | 1.803  | <0.001 |
| (SW West#Wild) vs (FW VI#Wild)           | 1.258  | 0.133 | 0.843  | 1.672  | <0.001 |
| (SW East#Wild) vs (SW East#Hatchery)     | -0.085 | 0.053 | -0.251 | 0.082  | 1.000  |
| (SW West#Hatchery) vs (SW East#Hatchery) | 0.248  | 0.091 | -0.036 | 0.531  | 0.178  |
| (SW West#Wild) vs (SW East#Hatchery)     | 0.149  | 0.070 | -0.070 | 0.369  | 0.940  |
| (SW West#Hatchery) vs (SW East#Wild)     | 0.332  | 0.085 | 0.067  | 0.598  | 0.003  |
| (SW West#Wild) vs (SW East#Wild)         | 0.234  | 0.062 | 0.040  | 0.428  | 0.005  |
| (SW West#Wild) vs (SW West#Hatchery)     | -0.098 | 0.092 | -0.385 | 0.188  | 1.000  |
|                                          |        |       |        |        |        |
| <b>c_b_cys</b>                           |        |       |        |        |        |
| (FW Main#Wild) vs (FW Main#Hatchery)     | -0.493 | 0.339 | -1.551 | 0.564  | 1.000  |
| (FW VI#Hatchery) vs (FW Main#Hatchery)   | -0.740 | 0.236 | -1.477 | -0.002 | 0.049  |
| (FW VI#Wild) vs (FW Main#Hatchery)       | -3.215 | 0.385 | -4.417 | -2.013 | <0.001 |
| (SW East#Hatchery) vs (FW Main#Hatchery) | 2.027  | 0.323 | 1.019  | 3.036  | <0.001 |
| (SW East#Wild) vs (FW Main#Hatchery)     | 1.440  | 0.242 | 0.684  | 2.196  | <0.001 |
| (SW West#Hatchery) vs (FW Main#Hatchery) | 2.469  | 0.617 | 0.541  | 4.396  | 0.002  |
| (SW West#Wild) vs (FW Main#Hatchery)     | 1.802  | 0.339 | 0.742  | 2.862  | <0.001 |
| (FW VI#Hatchery) vs (FW Main#Wild)       | -0.246 | 0.343 | -1.318 | 0.825  | 1.000  |
| (FW VI#Wild) vs (FW Main#Wild)           | -2.722 | 0.409 | -4.000 | -1.443 | <0.001 |
| (SW East#Hatchery) vs (FW Main#Wild)     | 2.520  | 0.370 | 1.366  | 3.675  | <0.001 |
| (SW East#Wild) vs (FW Main#Wild)         | 1.933  | 0.305 | 0.979  | 2.887  | <0.001 |
| (SW West#Hatchery) vs (FW Main#Wild)     | 2.962  | 0.643 | 0.953  | 4.971  | <0.001 |
| (SW West#Wild) vs (FW Main#Wild)         | 2.295  | 0.378 | 1.113  | 3.477  | <0.001 |
| (FW VI#Wild) vs (FW VI#Hatchery)         | -2.475 | 0.400 | -3.725 | -1.226 | <0.001 |
| (SW East#Hatchery) vs (FW VI#Hatchery)   | 2.767  | 0.337 | 1.714  | 3.820  | <0.001 |
| (SW East#Wild) vs (FW VI#Hatchery)       | 2.180  | 0.258 | 1.374  | 2.986  | <0.001 |
| (SW West#Hatchery) vs (FW VI#Hatchery)   | 3.208  | 0.619 | 1.275  | 5.141  | <0.001 |
| (SW West#Wild) vs (FW VI#Hatchery)       | 2.541  | 0.345 | 1.463  | 3.620  | <0.001 |
| (SW East#Hatchery) vs (FW VI#Wild)       | 5.242  | 0.432 | 3.894  | 6.590  | <0.001 |
| (SW East#Wild) vs (FW VI#Wild)           | 4.655  | 0.375 | 3.485  | 5.825  | <0.001 |
| (SW West#Hatchery) vs (FW VI#Wild)       | 5.684  | 0.680 | 3.560  | 7.808  | <0.001 |
| (SW West#Wild) vs (FW VI#Wild)           | 5.017  | 0.450 | 3.611  | 6.423  | <0.001 |
| (SW East#Wild) vs (SW East#Hatchery)     | -0.587 | 0.304 | -1.537 | 0.363  | 1.000  |
| (SW West#Hatchery) vs (SW East#Hatchery) | 0.442  | 0.648 | -1.582 | 2.465  | 1.000  |
| (SW West#Wild) vs (SW East#Hatchery)     | -0.225 | 0.386 | -1.432 | 0.981  | 1.000  |
| (SW West#Hatchery) vs (SW East#Wild)     | 1.029  | 0.608 | -0.871 | 2.929  | 1.000  |
| (SW West#Wild) vs (SW East#Wild)         | 0.362  | 0.312 | -0.614 | 1.337  | 1.000  |
| (SW West#Wild) vs (SW West#Hatchery)     | -0.667 | 0.639 | -2.663 | 1.329  | 1.000  |
|                                          |        |       |        |        |        |
| <b>lo_sal</b>                            |        |       |        |        |        |
| (FW Main#Wild) vs (FW Main#Hatchery)     | 4.473  | 1.030 | 1.254  | 7.691  | <0.001 |
| (FW VI#Hatchery) vs (FW Main#Hatchery)   | 3.495  | 1.030 | 0.279  | 6.712  | 0.019  |
| (FW VI#Wild) vs (FW Main#Hatchery)       | 3.360  | 1.075 | 0.003  | 6.717  | 0.049  |
| (SW East#Hatchery) vs (FW Main#Hatchery) | 4.833  | 1.009 | 1.682  | 7.984  | <0.001 |
| (SW East#Wild) vs (FW Main#Hatchery)     | 5.035  | 1.007 | 1.891  | 8.179  | <0.001 |
| (SW West#Hatchery) vs (FW Main#Hatchery) | 4.755  | 1.020 | 1.568  | 7.942  | <0.001 |
| (SW West#Wild) vs (FW Main#Hatchery)     | 5.098  | 1.012 | 1.937  | 8.259  | <0.001 |
| (FW VI#Hatchery) vs (FW Main#Wild)       | -0.977 | 0.334 | -2.022 | 0.067  | 0.097  |
| (FW VI#Wild) vs (FW Main#Wild)           | -1.113 | 0.441 | -2.491 | 0.265  | 0.326  |
| (SW East#Hatchery) vs (FW Main#Wild)     | 0.360  | 0.243 | -0.399 | 1.119  | 1.000  |
| (SW East#Wild) vs (FW Main#Wild)         | 0.562  | 0.235 | -0.172 | 1.296  | 0.469  |
| (SW West#Hatchery) vs (FW Main#Wild)     | 0.282  | 0.285 | -0.609 | 1.172  | 1.000  |
| (SW West#Wild) vs (FW Main#Wild)         | 0.625  | 0.254 | -0.168 | 1.418  | 0.387  |
| (FW VI#Wild) vs (FW VI#Hatchery)         | -0.135 | 0.458 | -1.566 | 1.295  | 1.000  |
| (SW East#Hatchery) vs (FW VI#Hatchery)   | 1.337  | 0.266 | 0.506  | 2.169  | <0.001 |
| (SW East#Wild) vs (FW VI#Hatchery)       | 1.539  | 0.256 | 0.739  | 2.340  | <0.001 |
| (SW West#Hatchery) vs (FW VI#Hatchery)   | 1.259  | 0.300 | 0.324  | 2.195  | 0.001  |
| (SW West#Wild) vs (FW VI#Hatchery)       | 1.602  | 0.272 | 0.753  | 2.451  | <0.001 |
| (SW East#Hatchery) vs (FW VI#Wild)       | 1.473  | 0.396 | 0.235  | 2.710  | 0.006  |

|                                          |        |       |        |        |        |
|------------------------------------------|--------|-------|--------|--------|--------|
| (SW East#Wild) vs (FW VI#Wild)           | 1.675  | 0.390 | 0.457  | 2.892  | <0.001 |
| (SW West#Hatchery) vs (FW VI#Wild)       | 1.395  | 0.422 | 0.077  | 2.712  | 0.026  |
| (SW West#Wild) vs (FW VI#Wild)           | 1.738  | 0.404 | 0.475  | 3.000  | <0.001 |
| (SW East#Wild) vs (SW East#Hatchery)     | 0.202  | 0.121 | -0.177 | 0.581  | 1.000  |
| (SW West#Hatchery) vs (SW East#Hatchery) | -0.078 | 0.209 | -0.731 | 0.575  | 1.000  |
| (SW West#Wild) vs (SW East#Hatchery)     | 0.265  | 0.161 | -0.239 | 0.769  | 1.000  |
| (SW West#Hatchery) vs (SW East#Wild)     | -0.280 | 0.194 | -0.887 | 0.327  | 1.000  |
| (SW West#Wild) vs (SW East#Wild)         | 0.063  | 0.141 | -0.377 | 0.503  | 1.000  |
| (SW West#Wild) vs (SW West#Hatchery)     | 0.343  | 0.210 | -0.314 | 1.000  | 1.000  |
|                                          |        |       |        |        |        |
| <b>my_arc</b>                            |        |       |        |        |        |
| (FW Main#Wild) vs (FW Main#Hatchery)     | 2.532  | 0.418 | 1.226  | 3.839  | <0.001 |
| (FW VI#Hatchery) vs (FW Main#Hatchery)   | -0.994 | 0.667 | -3.078 | 1.089  | 1.000  |
| (FW VI#Wild) vs (FW Main#Hatchery)       | 0.734  | 0.575 | -1.060 | 2.529  | 1.000  |
| (SW East#Hatchery) vs (FW Main#Hatchery) | 0.077  | 0.377 | -1.101 | 1.255  | 1.000  |
| (SW East#Wild) vs (FW Main#Hatchery)     | 1.091  | 0.342 | 0.024  | 2.158  | 0.039  |
| (SW West#Hatchery) vs (FW Main#Hatchery) | -0.969 | 0.672 | -3.068 | 1.129  | 1.000  |
| (SW West#Wild) vs (FW Main#Hatchery)     | 0.853  | 0.375 | -0.317 | 2.023  | 0.637  |
| (FW VI#Hatchery) vs (FW Main#Wild)       | -3.526 | 0.655 | -5.571 | -1.482 | <0.001 |
| (FW VI#Wild) vs (FW Main#Wild)           | -1.798 | 0.529 | -3.449 | -0.147 | 0.019  |
| (SW East#Hatchery) vs (FW Main#Wild)     | -2.455 | 0.310 | -3.424 | -1.487 | <0.001 |
| (SW East#Wild) vs (FW Main#Wild)         | -1.441 | 0.270 | -2.284 | -0.598 | <0.001 |
| (SW West#Hatchery) vs (FW Main#Wild)     | -3.502 | 0.635 | -5.484 | -1.519 | <0.001 |
| (SW West#Wild) vs (FW Main#Wild)         | -1.679 | 0.301 | -2.620 | -0.738 | <0.001 |
| (FW VI#Wild) vs (FW VI#Hatchery)         | 1.729  | 0.773 | -0.688 | 4.145  | 0.712  |
| (SW East#Hatchery) vs (FW VI#Hatchery)   | 1.071  | 0.633 | -0.907 | 3.049  | 1.000  |
| (SW East#Wild) vs (FW VI#Hatchery)       | 2.085  | 0.612 | 0.175  | 3.996  | 0.018  |
| (SW West#Hatchery) vs (FW VI#Hatchery)   | 0.025  | 0.838 | -2.593 | 2.642  | 1.000  |
| (SW West#Wild) vs (FW VI#Hatchery)       | 1.847  | 0.627 | -0.111 | 3.806  | 0.090  |
| (SW East#Hatchery) vs (FW VI#Wild)       | -0.657 | 0.515 | -2.265 | 0.951  | 1.000  |
| (SW East#Wild) vs (FW VI#Wild)           | 0.357  | 0.489 | -1.171 | 1.885  | 1.000  |
| (SW West#Hatchery) vs (FW VI#Wild)       | -1.704 | 0.757 | -4.069 | 0.662  | 0.686  |
| (SW West#Wild) vs (FW VI#Wild)           | 0.119  | 0.514 | -1.487 | 1.724  | 1.000  |
| (SW East#Wild) vs (SW East#Hatchery)     | 1.014  | 0.207 | 0.366  | 1.662  | <0.001 |
| (SW West#Hatchery) vs (SW East#Hatchery) | -1.046 | 0.618 | -2.978 | 0.886  | 1.000  |
| (SW West#Wild) vs (SW East#Hatchery)     | 0.776  | 0.261 | -0.040 | 1.593  | 0.084  |
| (SW West#Hatchery) vs (SW East#Wild)     | -2.061 | 0.595 | -3.920 | -0.201 | 0.015  |
| (SW West#Wild) vs (SW East#Wild)         | -0.238 | 0.199 | -0.861 | 0.385  | 1.000  |
| (SW West#Wild) vs (SW West#Hatchery)     | 1.822  | 0.606 | -0.070 | 3.715  | 0.074  |
|                                          |        |       |        |        |        |
| <b>pa_kab</b>                            |        |       |        |        |        |
| (FW VI#Hatchery) vs (FW Main#Wild)       | 0.834  | 0.480 | -0.667 | 2.335  | 1.000  |
| (FW VI#Wild) vs (FW Main#Wild)           | 1.148  | 0.527 | -0.497 | 2.793  | 0.819  |
| (SW East#Hatchery) vs (FW Main#Wild)     | -1.111 | 0.481 | -2.613 | 0.391  | 0.583  |
| (SW East#Wild) vs (FW Main#Wild)         | -0.732 | 0.433 | -2.085 | 0.621  | 1.000  |
| (SW West#Hatchery) vs (FW Main#Wild)     | -0.537 | 0.556 | -2.273 | 1.199  | 1.000  |
| (SW West#Wild) vs (FW Main#Wild)         | 0.536  | 0.430 | -0.806 | 1.878  | 1.000  |
| (FW VI#Wild) vs (FW VI#Hatchery)         | 0.314  | 0.459 | -1.120 | 1.749  | 1.000  |
| (SW East#Hatchery) vs (FW VI#Hatchery)   | -1.945 | 0.393 | -3.174 | -0.716 | <0.001 |
| (SW East#Wild) vs (FW VI#Hatchery)       | -1.566 | 0.328 | -2.590 | -0.542 | <0.001 |
| (SW West#Hatchery) vs (FW VI#Hatchery)   | -1.371 | 0.470 | -2.838 | 0.096  | 0.099  |
| (SW West#Wild) vs (FW VI#Hatchery)       | -0.298 | 0.322 | -1.303 | 0.708  | 1.000  |
| (SW East#Hatchery) vs (FW VI#Wild)       | -2.259 | 0.442 | -3.642 | -0.877 | <0.001 |
| (SW East#Wild) vs (FW VI#Wild)           | -1.880 | 0.391 | -3.102 | -0.658 | <0.001 |
| (SW West#Hatchery) vs (FW VI#Wild)       | -1.685 | 0.531 | -3.344 | -0.026 | 0.042  |
| (SW West#Wild) vs (FW VI#Wild)           | -0.612 | 0.406 | -1.881 | 0.657  | 1.000  |
| (SW East#Wild) vs (SW East#Hatchery)     | 0.379  | 0.321 | -0.624 | 1.382  | 1.000  |
| (SW West#Hatchery) vs (SW East#Hatchery) | 0.574  | 0.484 | -0.938 | 2.087  | 1.000  |
| (SW West#Wild) vs (SW East#Hatchery)     | 1.648  | 0.331 | 0.615  | 2.681  | <0.001 |

|                                          |        |       |        |        |        |
|------------------------------------------|--------|-------|--------|--------|--------|
| (SW West#Hatchery) vs (SW East#Wild)     | 0.195  | 0.431 | -1.150 | 1.540  | 1.000  |
| (SW West#Wild) vs (SW East#Wild)         | 1.268  | 0.241 | 0.515  | 2.021  | <0.001 |
| (SW West#Wild) vs (SW West#Hatchery)     | 1.073  | 0.419 | -0.235 | 2.382  | 0.291  |
| <b>pa_ther</b>                           |        |       |        |        |        |
| (SW East#Wild) vs (SW East#Hatchery)     | 0.313  | 0.115 | 0.010  | 0.616  | 0.039  |
| (SW West#Hatchery) vs (SW East#Hatchery) | 0.352  | 0.197 | -0.168 | 0.871  | 0.444  |
| (SW West#Wild) vs (SW East#Hatchery)     | 0.533  | 0.156 | 0.122  | 0.943  | 0.004  |
| (SW West#Hatchery) vs (SW East#Wild)     | 0.039  | 0.184 | -0.445 | 0.524  | 1.000  |
| (SW West#Wild) vs (SW East#Wild)         | 0.220  | 0.139 | -0.146 | 0.585  | 0.676  |
| (SW West#Wild) vs (SW West#Hatchery)     | 0.181  | 0.198 | -0.342 | 0.703  | 1.000  |
| <b>pa_pse</b>                            |        |       |        |        |        |
| (SW East#Wild) vs (SW East#Hatchery)     | 0.317  | 0.119 | 0.003  | 0.632  | 0.047  |
| (SW West#Hatchery) vs (SW East#Hatchery) | 0.632  | 0.202 | 0.100  | 1.163  | 0.010  |
| (SW West#Wild) vs (SW East#Hatchery)     | 0.751  | 0.161 | 0.327  | 1.175  | <0.001 |
| (SW West#Hatchery) vs (SW East#Wild)     | 0.314  | 0.187 | -0.178 | 0.807  | 0.554  |
| (SW West#Wild) vs (SW East#Wild)         | 0.434  | 0.141 | 0.061  | 0.806  | 0.013  |
| (SW West#Wild) vs (SW West#Hatchery)     | 0.119  | 0.202 | -0.413 | 0.651  | 1.000  |
| <b>pa_min</b>                            |        |       |        |        |        |
| (SW East#Wild) vs (SW East#Hatchery)     | -0.275 | 0.120 | -0.591 | 0.040  | 0.128  |
| (SW West#Hatchery) vs (SW East#Hatchery) | -1.002 | 0.212 | -1.562 | -0.442 | <0.001 |
| (SW West#Wild) vs (SW East#Hatchery)     | -1.397 | 0.173 | -1.854 | -0.941 | <0.001 |
| (SW West#Hatchery) vs (SW East#Wild)     | -0.727 | 0.198 | -1.249 | -0.204 | 0.001  |
| (SW West#Wild) vs (SW East#Wild)         | -1.122 | 0.156 | -1.532 | -0.712 | <0.001 |
| (SW West#Wild) vs (SW West#Hatchery)     | -0.395 | 0.222 | -0.980 | 0.189  | 0.447  |
| <b>sch</b>                               |        |       |        |        |        |
| (SW East#Wild) vs (SW East#Hatchery)     | -0.616 | 0.192 | -1.124 | -0.109 | 0.008  |
| (SW West#Hatchery) vs (SW East#Hatchery) | 0.134  | 0.293 | -0.639 | 0.907  | 1.000  |
| (SW West#Wild) vs (SW East#Hatchery)     | 0.150  | 0.226 | -0.447 | 0.748  | 1.000  |
| (SW West#Hatchery) vs (SW East#Wild)     | 0.750  | 0.284 | 0.002  | 1.498  | 0.049  |
| (SW West#Wild) vs (SW East#Wild)         | 0.767  | 0.214 | 0.203  | 1.331  | 0.002  |
| (SW West#Wild) vs (SW West#Hatchery)     | 0.017  | 0.287 | -0.739 | 0.772  | 1.000  |
| <b>ce_sha</b>                            |        |       |        |        |        |
| (SW East#Wild) vs (SW East#Hatchery)     | -0.519 | 0.232 | -1.132 | 0.094  | 0.152  |
| (SW West#Hatchery) vs (SW East#Hatchery) | 1.206  | 0.293 | 0.434  | 1.978  | <0.001 |
| (SW West#Wild) vs (SW East#Hatchery)     | 0.257  | 0.278 | -0.477 | 0.991  | 1.000  |
| (SW West#Hatchery) vs (SW East#Wild)     | 1.726  | 0.280 | 0.986  | 2.465  | <0.001 |
| (SW West#Wild) vs (SW East#Wild)         | 0.776  | 0.266 | 0.075  | 1.478  | 0.021  |
| (SW West#Wild) vs (SW West#Hatchery)     | -0.949 | 0.283 | -1.697 | -0.202 | 0.005  |
| <b>fl_psy</b>                            |        |       |        |        |        |
| (FW Main#Wild) vs (FW Main#Hatchery)     | -1.784 | 0.483 | -3.059 | -0.510 | 0.001  |
| (FW VI#Hatchery) vs (FW Main#Hatchery)   | -2.834 | 0.316 | -3.668 | -2.000 | <0.001 |
| (FW VI#Wild) vs (FW Main#Hatchery)       | -1.328 | 0.446 | -2.505 | -0.152 | 0.017  |
| (FW VI#Hatchery) vs (FW Main#Wild)       | -1.050 | 0.469 | -2.286 | 0.187  | 0.151  |
| (FW VI#Wild) vs (FW Main#Wild)           | 0.456  | 0.452 | -0.736 | 1.648  | 1.000  |
| (FW VI#Wild) vs (FW VI#Hatchery)         | 1.506  | 0.474 | 0.256  | 2.755  | 0.009  |
